# Supplementary material
Source: publisher site journal article supplement (https://www.dovepress.com/article/497811)
Supplement: Supplementary file 1 [file get_supplementary_file.php]

**Table S1 Patients in the training and validation group**

| **Training group（N=306）**   **Validation group（N=131）** **P** | | | | | |
| --- | --- | --- | --- | --- | --- |
| Age | 71.75±5.74 |  | 71.18±5.40 |  | 0.340 |
| Height | 162.72±7.25 |  | 163.21±7.79 |  | 0.557 |
| Weight | 61.56±10.33 |  | 61.74±10.37 |  | 0.758 |
| BMI | 23.22±3.54 |  | 23.12±3.22 |  | 0.782 |
| Surgery Time | 72.60±25.38 |  | 73.76±28.39 |  | 0.673 |
| HGB | 123.00±16.15 |  | 124.38±15.28 |  | 0.251 |
| RBC | 4.01±0.54 |  | 4.03±0.51 |  | 0.696 |
| HCT | 36.95±4.55 |  | 37.25±4.26 |  | 0.391 |
| PTL | 179.95±71.49 |  | 171.22±56.27 |  | 0.543 |
| PT | 13.42±1.37 |  | 13.49±1.65 |  | 0.758 |
| APTT | 38.57±5.99 |  | 38.47±5.76 |  | 0.882 |
| INR | 1.47±4.14 |  | 1.3±3.09 |  | 0.940 |
| TT | 17.73±1.75 |  | 17.89±2.41 |  | 0.582 |
| FIB | 3.78±0.95 |  | 3.76±0.98 |  | 0.729 |
| DD polymer | 5.78±5.5 |  | 5.52±5.44 |  | 0.693 |
| Blood calcium | 2.24±0.12 |  | 2.25±0.11 |  | 0.492 |
| CRP | 27.65±27.22 |  | 26.45±28.5 |  | 0.681 |
| ESR | 23.83±17.72 |  | 25.18±18.08 |  | 0.467 |
| SBP | 149.47±22.17 |  | 150.47±20.91 |  | 0.479 |
| DBP | 79.01±12.95 |  | 79.59±12.22 |  | 0.744 |
| LOS | 11.76±4.88 |  | 11.18±3.17 |  | 0.414 |
| Hypoalbuminaemia | |  |  |  |  |
| Without | 206 (67.3%) |  | 82 (62.6%) |  | 0.398 |
| With | 100 (32.7%) |  | 49 (37.4%) |  |  |
| Gender |  |  |  |  |  |
| Male | 91 (29.7%) |  | 46 (35.1%) |  | 0.319 |
| Female | 215 (70.3%) |  | 85 (64.9%) |  |  |
| Hypertension | |  |  |  |  |
| Without | 154 (50.3%) |  | 67 (51.1%) |  | 0.958 |
| With | 152 (49.7%) |  | 64 (48.9%) |  |  |
| Type 2 Diabetes |  |  |  |  |  |
| Without | 234 (76.5%) |  | 107 (81.7%) |  | 0.281 |
| With | 72 (23.5%) |  | 24 (18.3%) |  |  |
| Cardiovascular disease | |  |  |  |  |
| Without | 230 (75.2%) |  | 102 (77.9%) |  | 0.629 |
| With | 76 (24.8%) |  | 29 (22.1%) |  |  |
| Fracture |  |  |  |  |  |
| Without | 260 (85.0%) |  | 114 (87.0%) |  | 0.680 |
| With | 46 (15.0%) |  | 17 (13.0%) |  |  |
| ASA |  |  |  |  |  |
| <3 | 161 (52.6%) |  | 78 (59.5%) |  | 0.219 |
| ≥3 | 145 (47.4%) |  | 53 (40.5%) |  |  |
| Extent |  |  |  |  |  |
| Left | 174 (56.9%) |  | 71 (54.2%) |  | 0.683 |
| Right | 132 (43.1%) |  | 60 (45.8%) |  |  |
| Anesthesia | |  |  |  |  |
| SA | 263 (85.9%) |  | 106 (80.9%) |  | 0.236 |
| GA | 43 (14.1%) |  | 25 (19.1%) |  |  |
| Gastrointestinal diseases | |  |  |  |  |
| Without | 241 (78.8%) |  | 106 (80.9%) |  | 0.702 |
| With | 65 (21.2%) |  | 25 (19.1%) |  |  |
| Liver function | |  |  |  |  |
| Without | 251 (82%) |  | 111 (84.7%) |  | 0.583 |
| With | 55 (18%) |  | 20 (15.3%) |  |  |
